# Supplementary material for: Skp2-mediated MLKL degradation confers cisplatin-resistant in non-small cell lung cancer cells
Source: PubMed Central journal article supplement (PMC10397346; doi:10.1038/s42003-023-05166-6), 2023-08-02
Supplement: 42003_2023_5166_MOESM3_ESM.pdf [file 42003_2023_5166_MOESM3_ESM.pdf]

## **Description of Additional Supplementary Files**

File name: Supplementary Data 1

Description: The source data behind the graphs in the paper.
